# Supplementary material for: Efficacy and safety of acupuncture as an adjuvant treatment for acute pancreatitis: a protocol of systematic review and meta-analysis
Source: PubMed Central journal article supplement — BMJ Open. 2019 Jul 4;9(7):e029327. doi: 10.1136/bmjopen-2019-029327 (PMC6615812; doi:10.1136/bmjopen-2019-029327), 2019-07-04
Supplement: bmjopen-2019-029327.draft_revisions.pdf [file bmjopen-2019-029327.draft_revisions.pdf]

# BMJ Open

BMJ Open is committed to open peer review. As part of this commitment we make the peer review history of every article we publish publicly available.

When an article is published we post the peer reviewers' comments and the authors' responses online. We also post the versions of the paper that were used during peer review. These are the versions that the peer review comments apply to.

The versions of the paper that follow are the versions that were submitted during the peer review process. They are not the versions of record or the final published versions. They should not be cited or distributed as the published version of this manuscript.

BMJ Open is an open access journal and the full, final, typeset and author-corrected version of record of the manuscript is available on our site with no access controls, subscription charges or pay-per-view fees (<http://bmjopen.bmj.com>).

If you have any questions on BMJ Open's open peer review process please email [info.bmjopen@bmj.com](mailto:info.bmjopen@bmj.com)

# BMJ Open

## The efficacy and safety of acupuncture as an adjuvant treatment for acute pancreatitis: a protocol of systematic review and meta-analysis

|                               |                                                                                                                                                                                                                                                                                                                                                                                                                                                                                                                                                                                                                                                                                                                                       |
|-------------------------------|---------------------------------------------------------------------------------------------------------------------------------------------------------------------------------------------------------------------------------------------------------------------------------------------------------------------------------------------------------------------------------------------------------------------------------------------------------------------------------------------------------------------------------------------------------------------------------------------------------------------------------------------------------------------------------------------------------------------------------------|
| Journal:                      | <i>BMJ Open</i>                                                                                                                                                                                                                                                                                                                                                                                                                                                                                                                                                                                                                                                                                                                       |
| Manuscript ID                 | bmjopen-2019-029327                                                                                                                                                                                                                                                                                                                                                                                                                                                                                                                                                                                                                                                                                                                   |
| Article Type:                 | Protocol                                                                                                                                                                                                                                                                                                                                                                                                                                                                                                                                                                                                                                                                                                                              |
| Date Submitted by the Author: | 22-Jan-2019                                                                                                                                                                                                                                                                                                                                                                                                                                                                                                                                                                                                                                                                                                                           |
| Complete List of Authors:     | Zhang, Kai; Tianjin Gong An Hospital, Acupuncture and Moxibustion<br>Li, Chengyu; Beijing University of Chinese Medicine Affiliated<br>Dongzhimen Hospital, c. Key Laboratory of Chinese Internal Medicine of<br>Ministry of Education<br>Gao, Chao; Tianjin Medical University General Hospital, General Surgery<br>Department<br>Tang, Qilin; Tianjin University of Traditional Chinese medicine, Graduate<br>College<br>Zhai, Jingbo; Tianjin University of Traditional Chinese Medicine, Institute<br>of Traditional Chinese Medicine<br>Zhao, Chen; Hong Kong Baptist University, Hong Kong Chinese Medicine<br>Clinical Study Centre<br>Li, Yan; Tianjin Public Security Hospital, Department of Acupuncture and<br>Moxibustion |
| Keywords:                     | acupuncture, acute pancreatitis, systematic review                                                                                                                                                                                                                                                                                                                                                                                                                                                                                                                                                                                                                                                                                    |
|                               |                                                                                                                                                                                                                                                                                                                                                                                                                                                                                                                                                                                                                                                                                                                                       |

SCHOLARONE™  
Manuscripts

The efficacy and safety of acupuncture as an adjuvant treatment for acute pancreatitis:  
a protocol of systematic review and meta-analysis

Kai Zhang<sup>1†</sup>, Chengyu Li<sup>2†</sup>, Chao Gao<sup>3†</sup>, Qilin Tang<sup>4</sup>, Jingbo Zhai<sup>5\*</sup>, Chen Zhao<sup>6\*</sup>,

Yan Li<sup>1\*</sup>

<sup>1</sup>Department of Acupuncture and Moxibustion, Tianjin Public Security Hospital, Tianjin, 300042, China;

<sup>2</sup>Key Laboratory of Chinese Internal Medicine of Ministry of Education and Beijing, Dongzhimen Hospital, Beijing University of Chinese Medicine, Beijing 100700, China;

<sup>3</sup>Tianjin Institute of General Surgery, Tianjin Medical University General Hospital, Tianjin, 300052, China;

<sup>4</sup>Graduate College, Tianjin University of Traditional Chinese medicine, Tianjin, .301617, China;

<sup>5</sup>Institute of Traditional Chinese Medicine, Tianjin University of Traditional Chinese Medicine, Tianjin, 301617, China;

<sup>6</sup>Hong Kong Chinese Medicine Clinical Study Centre, Hong Kong Baptist University, Hong Kong, China.

†Kai Zhang, Chengyu Li and Chao Gao contributed equally.

\*Correspondence to Yan Li, liyan66950@sina.com; Jingbo Zhai, zhajingbo@foxmail.com; Chen Zhao, zyyzc2007@163.com

## ABSTRACT

### Introduction:

Acupuncture may be effective for acute pancreatitis. This systematic review aims to assess the efficacy and safety of acupuncture as an adjuvant treatment for acute pancreatitis.

### Methods and analysis:

We will search PubMed, the Cochrane Central Register of Controlled Trials,

1  
2  
3  
4 EMBASE, Web of Science, China National Knowledge Infrastructure (CNKI), Wan  
5 Fang Data and Chinese Science Journal Database (VIP) from inception to the present,  
6 to identify any eligible study. Only randomised controlled trials will be included. The  
7 selection of studies, data extraction and management will be completed by two  
8 reviewers, independently. The primary outcomes include the overall response rate,  
9 mortality during the treatment, transfer to the surgery or Intensive Care Unit (ICU)  
10 rate, gastrointestinal function and the Acute Physiology and Chronic Health  
11 Evaluation (APACHE) II scores. The secondary outcomes include the recovery time  
12 of blood amylase becoming normal, tumor necrosis factor  $\alpha$  (TNF- $\alpha$ ) counts,  
13 interleukin 6 (IL-6) counts, interleukin 10 (IL-10) counts, length of hospital stay and  
14 adverse events or reactions. RevMan 5.3 software will be used for statistical analyses.  
15 The risk of bias of included studies will be assessed by the Cochrane “risk of bias”  
16 tool.

#### 27 28 **Ethics and dissemination:**

29  
30 This study will not involve personal information. The ethical approval will not  
31 be required. The results will be published in a peer-reviewed journal. This protocol  
32 has been registered on PROSPERO (CRD42018115099).  
33  
34  
35  
36  
37

#### 38 39 **Strengths and limitations of this study**

- 40 ● We will only include randomised controlled trials.
- 41 ● Language and publication dates will not be restricted.
- 42 ● We will attempt to contact the original researchers by e-mail to obtain any  
43 missing or inadequate data.
- 44 ● We will conduct the sensitivity analysis to test whether the conclusions are  
45 robust.
- 46 ● Different types of acupuncture therapy may lead to a large degree of  
47 heterogeneity.
- 48
- 49
- 50
- 51
- 52
- 53
- 54
- 55
- 56
- 57
- 58
- 59
- 60

## Introduction

Acute pancreatitis (AP) is an inflammatory injury of the pancreas caused by edema, hemorrhage and necrosis associated with the digestion of pancreatic tissue [1]. AP is one of the most common acute abdominal diseases in clinical practice [1,2]. The mortality of AP is 2.1-7.8%, which takes up quite a lot of healthcare resources [3]. Despite the significant medical advancement in the last decade, the overall mortality of AP and SAP remains high [4-6]. The gastrointestinal disorder is a common clinical phenomenon in AP. Even in severe AP, bowel dysfunction, or failure, in the early stage of disease is quite common, which may lead to the translocation of inflammatory mediators and toxic products. This eventually causes systemic inflammatory response syndrome (SIRS) and multiple organ dysfunction syndrome (MODS) [7-9]. Therefore, improving the recovery of gastrointestinal function is of great significance for patients with AP [8,9]. A large amount of data supports the efficacy of acupuncture on gastrointestinal physiology, including: gastric acid secretion exercise, neurohormonal changes feelings and improving gastrointestinal function in patients with AP [10,11].

AP can cause severe abdominal pain, which makes it difficult for patients to recover. In severe cases, it affects heart function [12]. Effective pain relief can help patients recover and have shorter hospital stays. Opioids are safe and effective in treating AP patients. Compared with other analgesic drugs, opioids can reduce the need for supplemental analgesia [12]. However, frequent use of opioid analgesics may lead to opioid dependence [13,14]. One of the most important applications of acupuncture is for pain relief [15]. The analgesic effect of acupuncture is mainly achieved through the regulation of the central nervous system. Substances such as enkephalin, dynorphin, 5-hydroxytryptophan (5-HT), epinephrine, substance P and somatostatin produced in the spinal cord may contribute to acupuncture analgesic effects [16,17]. In this sense, acupuncture may be a suitable alternative to opioid analgesics in Oriental medicine because it is considered an effective analgesic therapy without dependence.

The morbidity and mortality of AP depend on the severity and balance of the

1  
2  
3  
4 inflammatory response[18]. In the early stage of SAP, pancreatic enzymes are  
5  
6 activated and released into the blood, which activate monocytes/macrophages and  
7  
8 release a large number of pro-inflammatory cytokines, such as tumour necrosis factor  
9  
10 (TNF- $\alpha$ ), interleukin 6 (IL-6), etc. They can stimulate various inflammatory cells and  
11  
12 an overactive pro-inflammatory response. This leads to an uncontrolled systemic  
13  
14 response that ultimately results in SIRS and MODS [18,19]. IL-6 can not only directly  
15  
16 damage vascular endothelial cells and activate inflammatory cells, but also worsen  
17  
18 inflammatory reactions. However, the body's self-protection mechanism increases the  
19  
20 anti-inflammatory factor interleukin 10 (IL-10) to inhibit the synthesis of the  
21  
22 pro-inflammatory factors mentioned above, finally blocking or delaying the systemic  
23  
24 inflammatory response. In addition, nuclear factor kB (NF-kB), a transcription factor,  
25  
26 is known to be highly expressed in AP [20]. Studies have shown that inhibiting  
27  
28 excessive inflammatory responses is the key to the treatment of AP. Changes in serum  
29  
30 IL-6, IL-10 and concentrations can be used as indicators to judge the severity of AP  
31  
32 and evaluate the prognosis [21]. The laboratory tests that have been proposed for the  
33  
34 assessment of AP severity also include soluble intercellular adhesion molecule-1,  
35  
36 acute phase proteins [C-reactive protein (CRP)] and so on [22,23].

37  
38 Acupuncture can reduce elevated pro-inflammatory mediators in the process of  
39  
40 inflammatory response, thus playing an anti-inflammatory role[24]. Animal  
41  
42 experiments found that electroacupuncture could reduce TNF- $\alpha$  and IL-6 in rats. As a  
43  
44 result, serum can alleviate local pancreatic injury and systemic inflammation [25-27].  
45  
46 It also increased serum IL-10 levels, and restored the balance between  
47  
48 proinflammatory and anti-inflammatory cytokines. Another study showed that  
49  
50 acupuncture might have therapeutic effect on AP through inhibition of NF-kB  
51  
52 expression and a reduction in the release of pro-inflammatory cytokines [28-29].  
53  
54 Clinical evidence also supported the clinical effects of acupuncture on  
55  
56 inflammatory responses. The study found that electroacupuncture could decrease  
57  
58 TNF- $\alpha$  , IL-6, CRP and increase IL-10 values to reestablish the balance between  
59  
60 proinflammatory and anti-inflammatory cytokines, and improve the inflammatory  
response of AP [30-32].

1  
2  
3  
4 However, there is a lack of high quality evidence for acupuncture in the  
5 treatment of AP. Thus, this systematic review is conducted to assess the efficacy and  
6 safety of acupuncture as an adjuvant treatment for acute pancreatitis.  
7  
8  
9

## 10 11 **Methods**

### 12 13 **Criteria for including studies in the review**

#### 14 15 **Types of studies**

16  
17 We will only include randomised controlled trials (RCTs) of acupuncture therapy  
18 for AP in any language or any publication. We will also remove low-quality studies  
19 without comparable baselines and re-used publications.  
20  
21  
22

#### 23 24 **Types of participants**

25 Participants diagnosed with AP according to the internationally acknowledged  
26 diagnostic criteria for AP were included. These criteria included: the revised Atlanta  
27 classification of AP; American clinical guide to AP; the clinical diagnostic criteria for  
28 acute pancreatitis developed by the pancreatic division of the surgery division of the  
29 Chinese medical association in 1996 or 2014; the diagnostic and therapeutic  
30 guidelines for severe acute pancreatitis in 2001; and the diagnostic and therapeutic  
31 guidelines for acute pancreatitis in China in 2004 [33-36]. All of the participants  
32 should accept acupuncture treatment and hospitalized within 48 hours of symptom  
33 onset. There is no restriction on age, gender or ethnicity of the enrolled subjects.  
34  
35  
36  
37  
38  
39  
40  
41  
42

#### 43 44 **Types of outcome**

##### 45 46 **The primary outcome**

47 The primary outcomes include the overall response rate, mortality during  
48 treatment, transfer to the surgery or ICU rate, gastrointestinal function and the Acute  
49 Physiology and Chronic Health Evaluation (APACHE) II scores.  
50  
51

52 The total efficiency standard is based on the diagnostic standard which was  
53 included in the draft of diagnosis and treatment of acute pancreatitis [37], set by the  
54 pancreas group of the surgical society of China medical association in 2000. It is  
55 divided into four grades: cure, obvious effect, effective and ineffective. It can be also  
56 based on the 2002 edition of the guidelines for clinical research of traditional Chinese  
57  
58  
59  
60

1  
2  
3  
4 medicine new drugs [32]. It is divided into three levels: obvious efficacy, effective  
5 efficacy and ineffective efficacy.  
6

7 Mortality during treatment: SAP can often cause SIRS and the associated  
8 mortality rate ranges from 25 to 30% [34,35]. The mortality of acute pancreatitis is an  
9 important indicator of prognosis.  
10  
11

12 Transfer to the surgery or ICU rate: SAP is difficult to treat with conservative  
13 therapy in the general ward and therefore, requires transfer to ICU surgery. It can  
14 often cause SIRS and MODS.  
15  
16

17 Gastrointestinal function includes the effect on abdominal pain and distension,  
18 recovery time of bowel sound, recovery time of defecation and the time for resuming  
19 to diets (days).  
20  
21

22 APACHE II is a useful prognostic scoring system for predicting the severity of  
23 acute pancreatitis and can be of vital importance in determining the group of patients  
24 who have more chance of requiring tertiary care in the course of treatment. The  
25 disease requires early resuscitation and timely referrals, especially in developing  
26 countries with limited resources [38,39].  
27  
28  
29  
30  
31  
32  
33

### 34 **The secondary outcome**

35 The secondary outcomes include: the recovery time of blood amylase becoming  
36 normal, TNF- $\alpha$  counts, IL-6 counts, IL-10 counts, length of hospital stay and adverse  
37 events or reactions.  
38  
39

### 40 **Types of interventions**

41 We will perform a systematic review and meta-analysis that includes all RCTs  
42 using acupuncture plus routine treatment (RT) in the treatment group and RT alone in  
43 the control group. RT comprises fluid resuscitation, use of antibiotics, nutritional  
44 support and mechanical ventilation when necessary.  
45  
46  
47  
48  
49  
50  
51

### 52 **Search strategy**

#### 53 **Electronic searches**

54 We will search the following electronic databases from their inception to the  
55 present: PubMed, the Cochrane Central Register of Controlled Trials, EMBASE, Web  
56  
57  
58  
59  
60



of Science, China National Knowledge Infrastructure (CNKI), Wan Fang Data and Chinese Science Journal Database (VIP).

The searching strategy for PubMed is listed in Table 1. Our study will not apply any language restrictions.

### Searching other resources

Before searching additional resources, we will check the reference lists of identified relevant AP and reviews for other studies. Then we will contact experts in the field of pancreatitis to determine any additional study. The WHO International Clinical Trials Registry Platform (ICTRP), Chinese Clinical Trial Registry, Clinical Trials.gov will also be reviewed to determine planned, ongoing or unpublished researches. The Google Scholar website will be searched to identify any grey literature.

Table.1 PubMed search strategy

|     |                                                                                  |
|-----|----------------------------------------------------------------------------------|
| #1  | pancreatitis [MeSH]                                                              |
| #2  | acute pancreatitis [MeSH]                                                        |
| #3  | pancreatitis, acute necrotizing [Abstract/Title]                                 |
| #4  | pancreatitis, alcoholic, cholelithic or familial hyperlipidemia [Abstract/Title] |
| #5  | OR/1-4                                                                           |
| #6  | acupuncture [MeSH]                                                               |
| #7  | acupuncture therapy [Abstract/Title]                                             |
| #8  | electroacupuncture [Abstract/Title]                                              |
| #9  | acupressure [Abstract/Title]                                                     |
| #10 | elongated needle [Abstract/Title]                                                |
| #11 | fire needle[Abstract/Title]                                                      |
| #12 | acupoint [Abstract/Title]                                                        |
| #13 | warming needle [Abstract/Title]                                                  |
| #14 | OR/6-13                                                                          |
| #15 | randomized controlled trial [pt]                                                 |

- 1  
2  
3  
4 #16 controlled clinical trial [pt]  
5  
6 #17 randomized [Abstract/Title]  
7  
8 #18 placebo [Abstract/Title]  
9  
10 #19 clinical trials as topic [Abstract/Title]  
11  
12 #20 randomly [Abstract/Title]  
13  
14 #21 trial [Abstract/Title]  
15  
16 #22 OR/15-21  
17  
18 #23 animals [MeSH] NOT humans [MeSH]  
19  
20 #24 #22 NOT #23  
21  
22 #25 #5 AND #14 AND #24  
23  
24
- 

## Data extraction and management

### Selection of studies

25  
26  
27  
28  
29 Data screening and the selection process will be completed independently by two  
30 reviewers (CG and KZ). They will cross check their results with each other. When  
31 disagreements occur between them, a third reviewer (QLT) will make the final  
32 decision. Hard copies of all included studies will be obtained and read in full-text  
33 version. Details of the selection process will be shown in the PRISMA flow chart  
34 (Figure 1).  
35  
36  
37  
38  
39

### Data extraction and management

40  
41  
42  
43 A piloted data extraction form that has been discussed and developed by all the  
44 reviewers will be assessed and extracted independently by two authors (QLT and KZ).  
45 The following information will be extracted from each included study: general  
46 information, details of study, study population, intervention characteristics and  
47 outcomes. Any disagreement in data extraction will be resolved by discussion or  
48 negotiation with a third arbitrator (CYL). If data presented in studies is unclear,  
49 missing or presented in a form that cannot be extracted, the authors of the study will  
50 retrieve the missing information from the corresponding authors.  
51  
52  
53  
54  
55  
56  
57  
58  
59  
60

1  
2  
3  
4  
5  
6  
7  
8  
9  
10  
11  
12  
13  
14  
15  
16  
17  
18  
19  
20  
21  
22  
23  
24  
25  
26  
27  
28  
29  
30  
31  
32  
33  
34  
35  
36  
37  
38  
39  
40  
41  
42  
43  
44  
45  
46  
47  
48  
49  
50  
51  
52  
53  
54  
55  
56  
57  
58  
59  
60

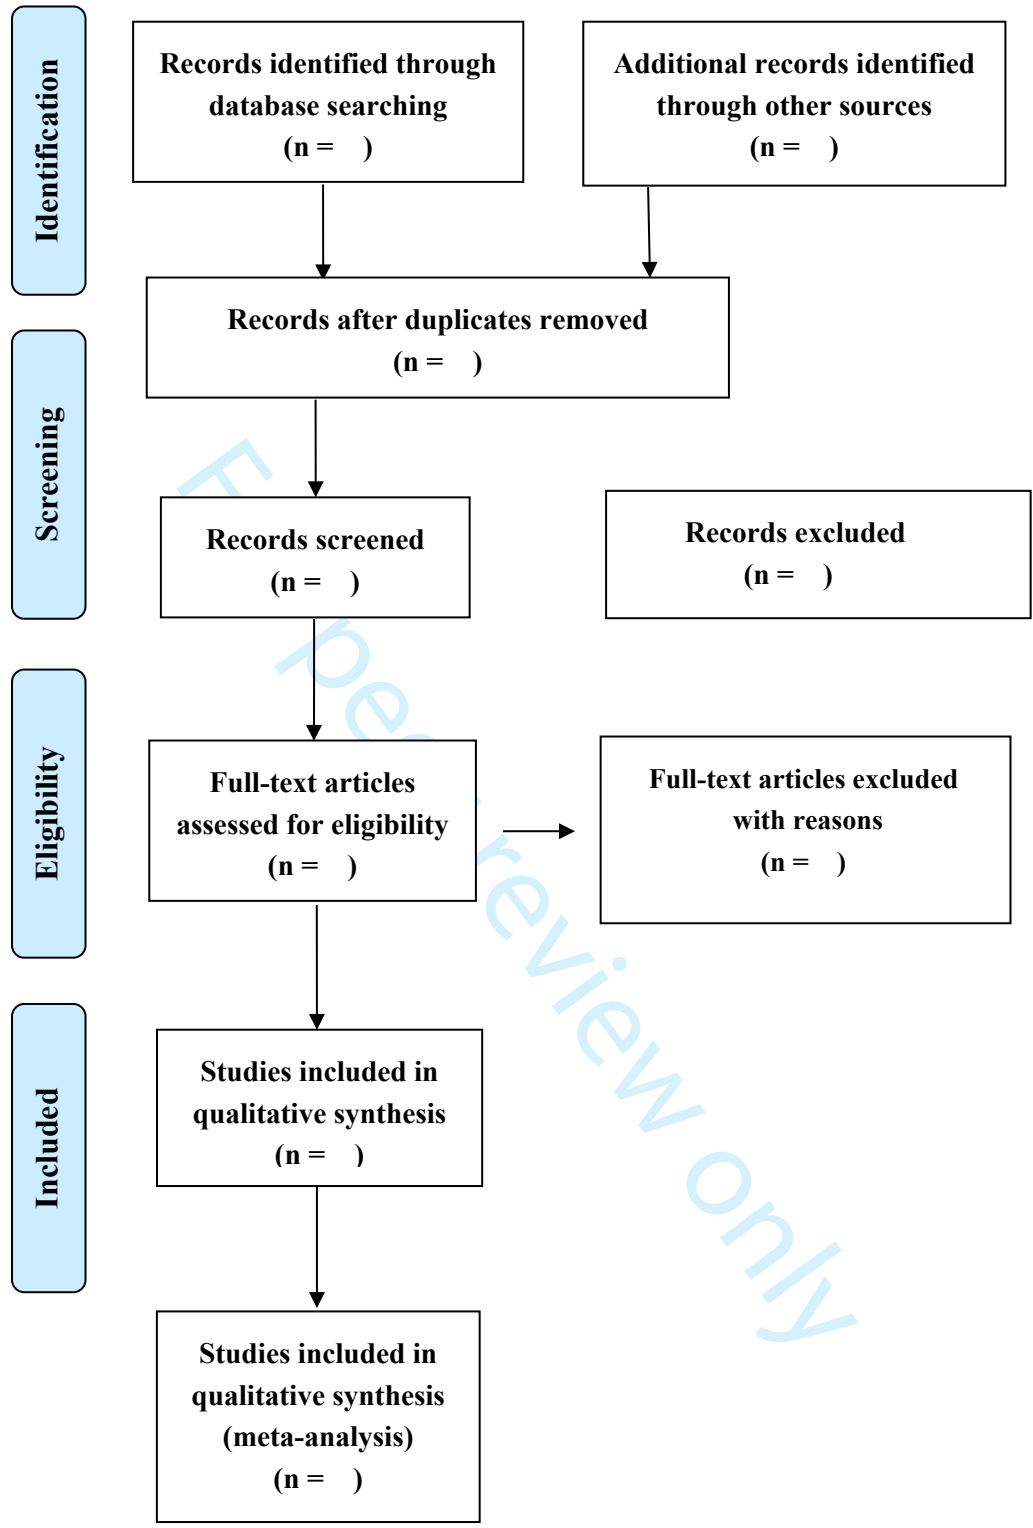

**Figure 1** Study selection flow diagram.

### **Risk of bias assessment**

Two reviewers (KZ and CYL) will individually assess the risk of bias using the Cochrane Collaboration's tool [40]. The following seven domains will be evaluated: (1) random sequence generation; (2) allocation concealment; (3) blinding of participants and personnel; (4) blinding of outcome assessment; (5) incomplete outcome data; (6) selective outcome reporting; (7) other sources of bias. The studies will then be classified into three levels of bias as high, low and unclear. Any difference will be resolved by discussion.

### **Measurement of treatment effect**

For continuous data, Mean Difference (MD) or Standard MD (SMD) will be used to measure the therapeutic effect with 95% confidence intervals (CIs). Risk ratios (RR) with 95% CIs will be calculated for dichotomous data.

### **Dealing with missing data**

We will attempt to contact the original researchers by e-mail to obtain any missing or inadequate data if there is a lack of results in the included studies. We will also obtain data by phone. If we cannot obtain accurate data through the above methods, then we will exclude this study.

### **Assessment of heterogeneity**

Heterogeneity will be analyzed through  $q$ -tests. When the  $P$ -value was below 0.1 or  $I^2$  is greater than 50%, the studies will be considered to have the heterogeneity. In this condition, a subgroup analysis will be used to find the source of heterogeneity.

### **Assessment of reporting biases**

We will assess publication bias using the funnel plot and Egger's test if more than 10 trials are included.

### **Data synthesis**

The meta-analysis will be conducted using the Review Manager (RevMan) V.5.3 software. We will describe the effect size with RR for dichotomous data, and MD or SMD for continuous data. If  $I^2$  is less than 50%, the fixed-effects model will be used for data synthesis. If  $I^2$  is greater than 50%, we will combine the data using random-effect model. A narrative description of the results will be conducted when

1  
2  
3  
4 the meta-analysis is not feasible.

### 5 6 **Subgroup analysis**

7 We will perform subgroup analysis to explore possible causes of heterogeneity if  
8 there are an adequate number of studies. Subgroup analysis will be conducted based  
9 on the type of acupuncture intervention (body acupuncture, electroacupuncture, fire  
10 needling, elongated needle, warming needling), acupuncture point (single or multiple  
11 points), the duration of treatment, age and gender if possible.  
12  
13  
14  
15  
16

### 17 18 **Sensitivity analysis**

19 We will conduct sensitivity analysis to test whether the conclusions are robust  
20 compared to the decisions made during the review process. The main methods of  
21 sensitivity analysis include: changing the inclusion criteria, excluding low-quality  
22 studies, and using different statistical methods to analyze the same data. If the  
23 diametrically opposite conclusions are obtained even after the exclusion of significant  
24 differences, then it indicates high sensitivity and low reliability of the results. Care  
25 should be taken in interpreting the results and conclusions. It also suggests that there  
26 are important and potential bias factors related to the impact of interventions, and the  
27 source of controversy should be further clarified.  
28  
29  
30  
31  
32  
33  
34  
35  
36

### 37 38 **Assessment method of evidence quality**

39 The quality of the evidence will be assessed using the Grading of  
40 Recommendations Assessment, Development and Evaluation (GRADE.) [41]. The  
41 evaluation items include risk of bias, inconsistency, indirectness, imprecision,  
42 publication bias. Two review authors (KZ and CG) will independently assess the  
43 quality of the evidence based on five levels of criteria. It will fall into one of four  
44 possible ratings: high, moderate, low and very low.  
45  
46  
47  
48  
49

### 50 51 **Ethics and dissemination**

52 This study will not involve personal information from individuals or violate their  
53 personal rights. Therefore, ethical approval will not be required. The results will be  
54 published in a peer-reviewed journal. Due to the lack of relevant literature in this field,  
55 this paper will add more recent studies into the analysis to provide stronger evidence  
56 for acupuncture treatment of AP and guide clinical practice and acupuncture research.  
57  
58  
59  
60

## **Patient and Public Involvement**

Patients' priorities, experience, and preferences were not involved in development of the research question, and outcome measures, the design of this study, or the recruitment to and conduct of the study. The results will be not disseminated to study participants.

## **Amendments**

If the protocol is modified, then the information will be described in the final report.

## **Discussion**

Acupuncture may be effective for AP. However, no systematic reviews on this topic have been published. This review will provide more convincing evidence on acupuncture for AP. This study has some potential limitations. Different types of acupuncture therapy may lead to a large degree of heterogeneity.

## **Protocol registration:**

This protocol has been registered on PROSPERO (CRD42018115099).

## **Contributors**

YL, JBZ and CZ conceived the study; these three authors provided general guidance to the drafting of the protocol. CG and KZ drafted the protocol. CYL designed the search strategy. CG, KZ, CYL and CZ drafted the manuscript. CG, KZ, CYL, CZ and QLT reviewed and revised the manuscript. All authors have read and approved the final version of the manuscript.

## **Funding**

This study was supported by the Scientific research project of Tianjin administration of traditional Chinese medicine (grant number: 13147).

1  
2  
3  
4 **Competing interests:** None declared.  
5

6  
7 **Ethics approval:** Not required.  
8

9  
10 **Provenance and peer review:** Not commissioned; externally peer reviewed.  
11

12 **Data sharing statement:** The final report of this systematic review will be published  
13 in a peer-reviewed scientific journal, and the data set will be made freely available.  
14  
15

16  
17 **Open access:** This is an Open Access article distributed in accordance with the terms  
18 of the Creative Commons Attribution Non Commercial (CC BY-NC 4.0) license,  
19 which permits others to distribute, remix, adapt and build upon this work  
20 non-commercially, and license their derivative works on different terms, provided the  
21 original work is properly cited and the use is non-commercial. See: [http://](http://creativecommons.org/licenses/by-nc/4.0/)  
22 [creativecommons.org/licenses/by-nc/4.0/](http://creativecommons.org/licenses/by-nc/4.0/)  
23  
24  
25

## 26 27 **Reference**

28  
29 [1]De Waele JJ. Rational use of antimicrobials in patients with severe acute  
30 pancreatitis. *Semin Respir Crit Care Med* 2011;32:174-80  
31

32  
33 [2]Lupia E, Pigozzi L, Goffi A, et al. Role of phosphoinositide 3-kinase in the  
34 pathogenesis of acute pancreatitis. *World J Gastroenterol* 2014;20:15190-9  
35

36  
37 [3]Sekimoto M, Takada T, Kawarada Y, et al. JPN guidelines for the management of  
38 acute pancreatitis: epidemiology, etiology, natural history, and outcome predictors in  
39 acute pancreatitis. *J Hepatobiliary Pancreat Surg* 2006;13:10–24.  
40

41  
42 [4]Li Y, Zhao Y, Feng L, et al. Comparison of the prognostic values of inflammation  
43 markers in patients with acute pancreatitis: a retrospective cohort study. *BMJ Open*  
44 2017;7:e013206  
45  
46

47  
48 [5]Van Dijk SM, Hallensleben NDL, van Santvoort HC, et al. Acute pancreatitis:  
49 recent advances through randomised trials. *Gut* 2017;66:2024-2032.  
50

51  
52 [6]Waller A, Long B, Koyfman A, et al. Acute Pancreatitis: Updates for Emergency  
53 Clinicians. *Journal of Emergency Medicine* 2018;55:769-779.  
54

55  
56 [7]Wang XP, Wang BX, Wu JX, et al. Beneficial effects of growth hormone on  
57 bacterial translocation during the course of acute necrotizing pancreatitis in rats.  
58  
59  
60

1  
2  
3  
4 Pancreas 2001, 23: 148 - 56  
5

6 [8] Schietroma M, Pessia B, Carlei F, et al. Intestinal permeability and systemic  
7 endotoxemia in patients with acute pancreatitis. *Ann Ital Chir* 2016;87:138–44.  
8

9  
10 [9] Qiao SF, Lu TJ, Sun JB, et al. Alterations of intestinal immune function and  
11 regulatory effects of L-arginine in experimental severe acute pancreatitis rats. *World J*  
12 *Gastroenterol* 2005;11:6216–8.  
13

14  
15 [10] Diehl, D. L. Acupuncture for gastrointestinal and hepatobiliary disorders. *Journal*  
16 *of Alternative and Complementary Medicine* 1999, 5: 27-45.  
17

18  
19 [11] Wang CW, Li N, He HB, et al. Effect of electroacupuncture of Tianshu (ST 25)  
20 on the rational symptoms of functional constipation patients and evaluation on its  
21 efficacy satisfaction: a single-center, prospective, practical and randomized control  
22 trial. *Zhen Ci Yan Jiu* 2010;35:375–9.  
23

24  
25 [12] Basurto Ona X, Rigau Comas D, Urrutia G. Opioids for acute pancreatitis pain.  
26 *The Cochrane Database of Systematic Reviews*. 2013;7:CD009179.  
27

28  
29 [13] Nusrat S, Yadav D, Bielefeldt K. Pain and opioid use in chronic pancreatitis.  
30 *Pancreas* 2012;41:264–70.  
31

32  
33 [14] Olesen AE, Brokjaer A, Fisher IW, Larsen IM. Pharmacological challenges in  
34 chronic pancreatitis. *World J Gastroenterol* 2013;19:7302–7.  
35

36  
37 [15] Astin JA, Marie A, Pelletier KR, Hansen E, Haskell WL. A review of the  
38 incorporation of complementary and alternative medicine by mainstream physicians.  
39 *Arch Intern Med* 1998;158:2303–10.  
40

41  
42 [16] Felson DT, Lawrence RC, Hochberg MC, et al. Osteoarthritis: new insights. Part.2.  
43 treatment approaches. *Annals of Internal Medicine* 2000, 33:726-737  
44

45  
46 [17] Andersson S, Lundeberg T. Acupuncture—from empiricism to science:  
47 functional background to acupuncture effects in pain and disease. *Med Hypotheses*.  
48 1995;45:271–81.  
49

50  
51 [18] Cosen-Binker LI, Binker MG, Negri G, et al. Acute pancreatitis possible initial  
52 triggering mechanism and prophylaxis. *Pancreatology* 2003;3:445–56.  
53

54  
55 [19] Winso, O., et al. Thoracic epidural anaesthesia reduces insulin resistance and  
56  
57  
58  
59  
60



1  
2  
3  
4 inflammatory response in experimental acute pancreatitis. *Upsala journal of medical*  
5 *sciences*: 2018;23:1-9.

6  
7 [20]Pooram N, Indaram A, Singh P, et al. Cytokines(IL-6, IL-8, TNF):early and  
8 reliable predictors of severe acute pancreatitis. *J Clin Gastroenterol* 2003, 37:263-266

9  
10 [21]Cosen, Binker LI, Binker MG, Cosen R, et al. Influence of nitric oxide donating  
11 nonsteroidal anti-inflammatory drugs on the evolution of acute pancreatitis. *Strock*  
12 *2006,25:190*

13  
14 [22]Kolber, W., et al. Serum Urokinase-Type Plasminogen Activator Receptor Does  
15 Not Outperform C-Reactive Protein and Procalcitonin as an Early Marker of Severity  
16 of Acute Pancreatitis. *Journal of Clinical Medicine* 2018,7.

17  
18 [23]Nie, S., et al. Inhibiting role of rosiglitazone in the regulation of inflammatory  
19 response and protective effects for severe acute pancreatitis in mice. *Journal of*  
20 *Cellular Biochemistry* 2019,120: 799-808.

21  
22 [24]Xue Q-m, Huang L, Li N. Effects of electroacupuncture at Tianshu (ST25) on  
23 pro- and anti-inflammatory cytokines in rats with severe acute pancreatitis. *Zhong Xi*  
24 *Yi Jie He Xue Bao* 2011;9:658–64.

25  
26 [25]Torres-Rosas R, Yehia G, Peña G, et al. Dopamine mediates vagal modulation of  
27 the immune system by electroacupuncture. *Nat Med* 2014;20:291–295.

28  
29 [26]Xue QM, Li N, Xue P, et al. Effect of electroacupuncture "zusanli" on serum  
30 proinflammatory factor and pancreatic nuclear factor -kb activity in rats with acute  
31 pancreatitis. *Acupuncture research* 2011;36 : 272-276

32  
33 [27]Xue QM, Huang L, Li N. Effect of electroacupuncture at tianshu point on serum  
34 proinflammatory factors and anti-inflammatory factors in rats with severe acute  
35 pancreatitis. *Journal of integrated traditional Chinese and western medicine* 2011,9:  
36 658 664

37  
38 [28] Xue, Q.-M., et al.. Effects of acupuncture at ST25 on inflammatory mediators  
39 and nuclear factor kappa B activation in a rat model of severe acute pancreatitis.  
40 *Acupuncture in Medicine* 2015, 33: 299-304.

41  
42 [29] Xue QM, Huang L, Pan H, Li N. Experimental study on the regulation of  
43 inflammation in rats with severe acute pancreatitis by electroacupuncture at zusanli  
44  
45  
46  
47  
48  
49  
50  
51  
52  
53  
54  
55  
56  
57  
58  
59  
60

- point . Emergency of traditional Chinese medicine 2013;22:1647-1649.
- [30]Zhu SF, Guo H, Zhang RR, Zhang Y, Li J, Zhao XL, et al. Effect of electroacupuncture on the inflammatory response in patients with acute pancreatitis: an exploratory study. *Acupunct Med* 2015;33:115–20.
- [31]Li, L., et al. Clinical Effect of Electroacupuncture on Lung Injury Patients Caused by Severe Acute Pancreatitis. *Evidence-based Complementary and Alternative Medicine* 2017:1-6
- [32]Luo,Y.H., et al. Efficacy observation of electroacupuncture intervention on severe acute pancreatitis at early stage complicated with intestinal paralysis. *Zhongguo Zhen Jiu* 2011;31: 105-109.
- [33]Sarr MG. 2012 revision of the Atlanta classification of acute pancreatitis. *Pol Arch Med Wewn.* 2013;123:118-24
- [34]Banks PA, Bollen TL, Dervenis C, et al. Classification of acute pancreatitis—2012: revision of the Atlanta classification and definitions by international consensus. *Gut* 2013;62:102-102.
- [35]Munigala S, Subramaniam D, Subramaniam DP, et al. Predictors for early readmission in acute pancreatitis (AP) in the United States (US) - A nationwide population based study. *Pancreatology* 2017;17:534-542.
- [36]Zhao YP , Clinical importance of guideline for severe acute pancreatitis of China. *Zhonghua wai ke za zhi* 2007;45:721.
- [37]Wang XY. Effect of Electroacupuncture on Acute Pancreatitis and Its Intestinal Permeability[J].*Chinese Acupuncture and Moxibustion* 2007;27(6):421-423.
- [38]Kumar, A. H. and M. S. Griwan. A comparison of APACHE II, BISAP, Ranson's score and modified CTSI in predicting the severity of acute pancreatitis based on the 2012 revised Atlanta Classification. *Gastroenterology Report* 2018;6(2): 127-131.
- [39]Rathnakar, S. K., et al.. Accuracy and Predictability of PANC-3 Scoring System over APACHE II in Acute Pancreatitis: A Prospective Study. *Journal of Clinical and Diagnostic Research* 2017;11(2): PC10-PC13.
- [40]Wang S, Yang H, Zhang J, et al. Efficacy and safety assessment of acupuncture and nimodipine to treat mild cognitive impairment after cerebral infarction: a

1  
2  
3  
4 randomized controlled trial. BMC Complement Altern Med 2016;16:361.

5 [41]M.S. Lee, J.I. Kim, J.C. Kong, D.H. Lee, B.C. Shin, Developing and validating a  
6 sham cupping device, Acupunct. Med. 28 (4) (2010) 200–204, [http://dx.doi.org/10.](http://dx.doi.org/10.1136/aim.2010.002329)  
7  
8  
9  
10 1136/aim.2010.002329 Epub 2010 Jul 19.

11  
12  
13  
14  
15  
16  
17  
18  
19  
20  
21  
22  
23  
24  
25  
26  
27  
28  
29  
30  
31  
32  
33  
34  
35  
36  
37  
38  
39  
40  
41  
42  
43  
44  
45  
46  
47  
48  
49  
50  
51  
52  
53  
54  
55  
56  
57  
58  
59  
60

For peer review only

## PRISMA-P 2015 checklist

| Section and topic          | Item No | Checklist item                                                                                                                                                                                  | Page |
|----------------------------|---------|-------------------------------------------------------------------------------------------------------------------------------------------------------------------------------------------------|------|
| Administrative information |         |                                                                                                                                                                                                 |      |
| Title                      |         |                                                                                                                                                                                                 |      |
| Identification             | 1a      | Identify the report as a protocol of a systematic review                                                                                                                                        | 1    |
| Update                     | 1b      | If the protocol is for an update of a previous systematic review, identify as such                                                                                                              | No   |
| Registration               | 2       | If registered, provide the name of the registry (such as PROSPERO) and registration number                                                                                                      | 2    |
| Authors:                   |         |                                                                                                                                                                                                 |      |
| Contact                    | 3a      | Provide name, institutional affiliation, e-mail address of all protocol authors; provide physical mailing address of corresponding author                                                       | 1    |
| Contributions              | 3b      | Describe contributions of protocol authors and identify the guarantor of the review                                                                                                             | 12   |
| Amendments                 | 4       | If the protocol represents an amendment of a previously completed or published protocol, identify as such and list changes; otherwise, state plan for documenting important protocol amendments | 12   |
| Support:                   |         |                                                                                                                                                                                                 |      |
| Sources                    | 5a      | Indicate sources of financial or other support for the review                                                                                                                                   | 12   |
| Sponsor                    | 5b      | Provide name for the review funder and/or sponsor                                                                                                                                               | 12   |
| Role of sponsor or funder  | 5c      | Describe roles of funder(s), sponsor(s), and/or institution(s), if any, in developing the protocol                                                                                              | 12   |
| Introduction               |         |                                                                                                                                                                                                 |      |
| Rationale                  | 6       | Describe the rationale for the review in the context of what is already known                                                                                                                   | 3-5  |
| Objectives                 | 7       | Provide an explicit statement of the question(s) the review will address with reference to participants, interventions, comparators, and outcomes (PICO)                                        | 5    |
| Methods                    |         |                                                                                                                                                                                                 |      |
| Eligibility criteria       | 8       | Specify the study characteristics (such as PICO, study design, setting, time frame) and report                                                                                                  | 5-6  |

|                                    |     |                                                                                                                                                                                                                                                           |      |
|------------------------------------|-----|-----------------------------------------------------------------------------------------------------------------------------------------------------------------------------------------------------------------------------------------------------------|------|
|                                    |     | characteristics (such as years considered, language, publication status) to be used as criteria for eligibility for the review                                                                                                                            |      |
| Information sources                | 9   | Describe all intended information sources (such as electronic databases, contact with study authors, trial registers or other grey literature sources) with planned dates of coverage                                                                     | 6-8  |
| Search strategy                    | 10  | Present draft of search strategy to be used for at least one electronic database, including planned limits, such that it could be repeated                                                                                                                | 6-8  |
| Study records                      |     |                                                                                                                                                                                                                                                           |      |
| Data management                    | 11a | Describe the mechanism(s) that will be used to manage records and data throughout the review                                                                                                                                                              | 8    |
| Selection process                  | 11b | State the process that will be used for selecting studies (such as two independent reviewers) through each phase of the review (that is, screening, eligibility and inclusion in meta-analysis)                                                           | 8    |
| Data collection process            | 11c | Describe planned method of extracting data from reports (such as piloting forms, done independently, in duplicate), any processes for obtaining and confirming data from investigators                                                                    | 8    |
| Data items                         | 12  | List and define all variables for which data will be sought (such as PICO items, funding sources), any pre-planned data assumptions and simplifications                                                                                                   | 8    |
| Outcomes and prioritization        | 13  | List and define all outcomes for which data will be sought, including prioritization of main and additional outcomes, with rationale                                                                                                                      | 6    |
| Risk of bias in individual studies | 14  | Describe anticipated methods for assessing risk of bias of individual studies, including whether this will be done at the outcome or study level, or both; state how this information will be used in data synthesis                                      | 9-10 |
| Data synthesis                     | 15a | Describe criteria under which study data will be quantitatively synthesised                                                                                                                                                                               | 10   |
|                                    | 15b | If data are appropriate for quantitative synthesis, describe planned summary measures, methods of handling data and methods of combining data from studies, including any planned exploration of consistency (such as I <sup>2</sup> , Kendall's $\tau$ ) | 10   |

|                                   |     |                                                                                                                               |    |
|-----------------------------------|-----|-------------------------------------------------------------------------------------------------------------------------------|----|
|                                   | 15c | Describe any proposed additional analyses (such as sensitivity or subgroup analyses, meta-regression)                         | 11 |
|                                   | 15d | If quantitative synthesis is not appropriate, describe the type of summary planned                                            | 10 |
| Meta-bias(es)                     | 16  | Specify any planned assessment of meta-bias(es) (such as publication bias across studies, selective reporting within studies) | 10 |
| Confidence in cumulative evidence | 17  | Describe how the strength of the body of evidence will be assessed (such as GRADE)                                            | 11 |

# BMJ Open

## The efficacy and safety of acupuncture as an adjuvant treatment for acute pancreatitis: a protocol of systematic review and meta-analysis

|                                 |                                                                                                                                                                                                                                                                                                                                                                                                                                                                                                                                                                                                                                                                                                                                                        |
|---------------------------------|--------------------------------------------------------------------------------------------------------------------------------------------------------------------------------------------------------------------------------------------------------------------------------------------------------------------------------------------------------------------------------------------------------------------------------------------------------------------------------------------------------------------------------------------------------------------------------------------------------------------------------------------------------------------------------------------------------------------------------------------------------|
| Journal:                        | <i>BMJ Open</i>                                                                                                                                                                                                                                                                                                                                                                                                                                                                                                                                                                                                                                                                                                                                        |
| Manuscript ID                   | bmjopen-2019-029327.R1                                                                                                                                                                                                                                                                                                                                                                                                                                                                                                                                                                                                                                                                                                                                 |
| Article Type:                   | Protocol                                                                                                                                                                                                                                                                                                                                                                                                                                                                                                                                                                                                                                                                                                                                               |
| Date Submitted by the Author:   | 09-Apr-2019                                                                                                                                                                                                                                                                                                                                                                                                                                                                                                                                                                                                                                                                                                                                            |
| Complete List of Authors:       | Zhang, Kai; Tianjin Gong An Hospital, Department of Acupuncture and Moxibustion<br>Li, Chengyu; Beijing University of Chinese Medicine Affiliated Dongzhimen Hospital, Key Laboratory of Chinese Internal Medicine of Ministry of Education and Beijing<br>Gao, Chao; Tianjin Medical University General Hospital, Tianjin Institute of General Surgery<br>zhao, chen; China Academy of Chinese Medical Sciences, Institute of Basic Research in Clinical Medicine<br>Tang, Qilin; Tianjin University of Traditional Chinese Medicine, Graduate College<br>Zhai, Jingbo; Tianjin University of Traditional Chinese Medicine, Institute of Traditional Chinese Medicine<br>Li, Yan; Tianjin Gong An Hospital, Department of Acupuncture and Moxibustion |
| <b>Primary Subject Heading</b>: | Gastroenterology and hepatology                                                                                                                                                                                                                                                                                                                                                                                                                                                                                                                                                                                                                                                                                                                        |
| Secondary Subject Heading:      | Gastroenterology and hepatology                                                                                                                                                                                                                                                                                                                                                                                                                                                                                                                                                                                                                                                                                                                        |
| Keywords:                       | acupuncture, acute pancreatitis, systematic review                                                                                                                                                                                                                                                                                                                                                                                                                                                                                                                                                                                                                                                                                                     |
|                                 |                                                                                                                                                                                                                                                                                                                                                                                                                                                                                                                                                                                                                                                                                                                                                        |

SCHOLARONE™  
Manuscripts

The efficacy and safety of acupuncture as an adjuvant treatment for acute pancreatitis:  
a protocol of systematic review and meta-analysis

Kai Zhang<sup>1†</sup>, Chengyu Li<sup>2†</sup>, Chao Gao<sup>3†</sup>, Chen Zhao<sup>4†</sup>, Qilin Tang<sup>5†</sup>, Jingbo Zhai<sup>6\*</sup>,

Yan Li<sup>1\*</sup>

<sup>1</sup>Department of Acupuncture and Moxibustion, Tianjin Gong An Hospital, Tianjin, 300042, China;

<sup>2</sup>Key Laboratory of Chinese Internal Medicine of Ministry of Education and Beijing, Dongzhimen Hospital, Beijing University of Chinese Medicine, Beijing, 100700, China;

<sup>3</sup>Tianjin Institute of General Surgery, Tianjin Medical University General Hospital, Tianjin, 300052, China;

<sup>4</sup>Institute of Basic Research in Clinical Medicine, China Academy of Chinese Medical Sciences, Beijing, 100700, China;

<sup>5</sup>Graduate College, Tianjin University of Traditional Chinese medicine, Tianjin, 301617, China;

<sup>6</sup>Institute of Traditional Chinese Medicine, Tianjin University of Traditional Chinese Medicine, Tianjin, 301617, China;

<sup>†</sup>Kai Zhang, Chengyu Li, Chao Gao, Chen Zhao and Qilin Tang contributed equally.

\*Correspondence to Yan Li, liyan66950@sina.com; Jingbo Zhai, zhaijingbo@foxmail.com

## ABSTRACT

### Introduction:

Acupuncture may be effective for acute pancreatitis. This systematic review aims to assess the efficacy and safety of acupuncture as an adjuvant treatment for acute pancreatitis.

### Methods and analysis:

We will search PubMed, the Cochrane Central Register of Controlled Trials,



1  
2  
3  
4 EMBASE, Web of Science, China National Knowledge Infrastructure (CNKI), Wan  
5 Fang Data and Chinese Science Journal Database from inception to June 30, 2019 to  
6 identify any eligible study. Only randomised controlled trials will be included. The  
7 selection of studies, data extraction and management will be completed by two  
8 reviewers independently. The primary outcomes include the overall response rate,  
9 mortality during the treatment, the proportion of patients with severe acute  
10 pancreatitis transferred to the Intensive Care Unit (ICU) or scheduled for surgery,  
11 gastrointestinal function and the Acute Physiology And Chronic Health Evaluation  
12 (APACHE) II scores. The secondary outcomes include visual analogue scale (VAS),  
13 the use of analgesics, the recovery time of blood amylase becoming normal, tumor  
14 necrosis factor  $\alpha$  (TNF- $\alpha$ ) counts, interleukin 6 (IL-6) counts, interleukin 10 (IL-10)  
15 counts, length of hospital stay and adverse events related to acupuncture (such as  
16 fainting, nausea, haematoma and local infection). RevMan 5.3 software will be used  
17 for statistical analyses. The risk of bias of included studies will be assessed by the  
18 Cochrane “risk of bias” tool.

### 31 **Ethics and dissemination:**

32  
33  
34  
35 This study will not involve personal information. The ethical approval will not  
36 be required. The results will be published in a peer-reviewed journal. This protocol  
37 has been registered on PROSPERO (CRD42018115099).  
38  
39  
40  
41  
42

### 43 **Strengths and limitations of this study**

- 44 ● We will only include randomised controlled trials.
- 45 ● Language and publication date will not be restricted.
- 46 ● We will attempt to contact the original researchers by e-mail to obtain any  
47 missing or inadequate data.
- 48 ● We will conduct the sensitivity analysis to test whether the conclusions are  
49 robust.
- 50 ● Different types of acupuncture therapy may lead to a large degree of  
51 heterogeneity.
- 52
- 53
- 54
- 55
- 56
- 57
- 58
- 59
- 60

## Introduction

Acute pancreatitis (AP) is an inflammatory injury of the pancreas caused by edema, hemorrhage and necrosis associated with the digestion of pancreatic tissue<sup>[1,2]</sup>. AP is one of the most common acute abdominal diseases in clinical practice<sup>[3,4]</sup>. Despite the rapid medical advancement in the last decade, the overall mortality of AP and severe acute pancreatitis (SAP) remains high<sup>[5-7]</sup>. The gastrointestinal disorder is a common clinical phenomenon in AP<sup>[8]</sup>. In the early stage of SAP, the bowel dysfunction is one of common symptoms, which may lead to the translocation of inflammatory mediators and toxic products. This eventually causes systemic inflammatory response syndrome (SIRS) and multiple organ dysfunction syndrome (MODS)<sup>[9-11]</sup>. Therefore, improving the recovery of gastrointestinal function is very important for patients with AP. Some studies showed the efficacy of acupuncture for gastrointestinal disorders<sup>[12,13]</sup>.

Opioids are safe and effective in treating AP patients. Compared with other analgesic drugs, opioids can reduce the need for supplemental analgesia<sup>[14]</sup>. However, frequent use of opioid analgesics may lead to opioid dependence<sup>[15]</sup>. One of the most important applications of acupuncture is for pain relief<sup>[16]</sup>. The analgesic effect of acupuncture is mainly achieved by the regulation of the central nervous system. Substances such as enkephalin, dynorphin, 5-hydroxytryptophan, epinephrine and somatostatin produced in the spinal cord may contribute to analgesic effects of acupuncture<sup>[17,18]</sup>. Acupuncture may be a suitable alternative to opioid analgesics because it is considered an effective analgesic therapy without dependence.

The morbidity and mortality of AP depend on the severity and balance of the inflammatory response<sup>[19]</sup>. In the early stage of SAP, pancreatic enzymes are activated and released into the blood, which activate monocytes/macrophages and release a large number of pro-inflammatory cytokines, such as tumour necrosis factor  $\alpha$  (TNF- $\alpha$ ), interleukin 6 (IL-6), etc. They can stimulate various inflammatory cells and cause an overactive pro-inflammatory response. This leads to an uncontrolled systemic response that ultimately results in SIRS and MODS<sup>[19,20]</sup>. IL-6 can not only directly damage vascular endothelial cells and activate inflammatory cells, but also

1  
2  
3  
4 aggravate inflammatory reactions. However, the self-protection mechanism increases  
5 the anti-inflammatory factor interleukin 10 (IL-10) to inhibit the synthesis of the  
6 pro-inflammatory factors mentioned above, and finally reduces the systemic  
7 inflammatory response. Studies have shown that inhibiting excessive inflammatory  
8 responses is the key to the treatment of AP. Changes in serum IL-6 and IL-10 can be  
9 used as indicators to judge the severity of AP and evaluate the prognosis<sup>[21]</sup>.

15 Acupuncture can reduce pro-inflammatory mediators in the process of  
16 inflammatory response<sup>[22]</sup>. An experiment found that electroacupuncture could reduce  
17 TNF- $\alpha$  and IL-6 in rats<sup>[23]</sup>. Another study showed that acupuncture might have  
18 therapeutic effects on AP by inhibiting nuclear factor  $\kappa$ B expression and reducing  
19 the release of pro-inflammatory cytokines<sup>[24]</sup>. Some studies found that  
20 electroacupuncture could decrease TNF- $\alpha$ , IL-6, and increase IL-10 to reestablish the  
21 balance between pro-inflammatory and anti-inflammatory cytokines, and reduce the  
22 inflammatory response in AP<sup>[25-27]</sup>.

23  
24 To our knowledge, there is a lack of high-quality evidence on acupuncture in the  
25 treatment of AP. Thus, this systematic review aims to assess the efficacy and safety of  
26 acupuncture as an adjuvant treatment for acute pancreatitis.

## 39 **Methods**

### 41 **Criteria for including studies in the review**

#### 43 **Types of studies**

45 We will only include randomised controlled trials (RCTs) of acupuncture therapy  
46 for AP regardless of any language or publication status. We will also remove studies  
47 without comparable baselines and duplicate publications.

#### 51 **Types of participants**

53 Participants diagnosed with AP according to the internationally acknowledged  
54 diagnostic criteria for AP will be included. These criteria include: the revised Atlanta  
55 classification of AP, American clinical guideline for AP, the clinical diagnostic  
56 criteria for AP developed by the pancreatic division of the surgery division of the  
57  
58  
59  
60

1  
2  
3  
4 Chinese medical association in 1996 or 2014, the diagnostic and therapeutic guideline  
5 for SAP in 2001, and the diagnostic and therapeutic guideline for AP in China in  
6 2004<sup>[28-31]</sup>. All of the participants should receive acupuncture treatment and be  
7 hospitalised within 48 hours of symptom onset. There is no restriction on age, gender  
8 or ethnicity of the enrolled subjects.

### 13 **Types of outcomes**

#### 14 **The primary outcomes**

15  
16 The primary outcomes include the overall response rate, mortality during  
17 treatment, the proportion of SAP patients transferred to the Intensive Care Unit (ICU)  
18 or scheduled for surgery, gastrointestinal function and the Acute Physiology And  
19 Chronic Health Evaluation (APACHE) II scores.

20  
21 The overall response rate is computed based on the diagnostic standard in the  
22 draft of diagnosis and treatment of acute pancreatitis proposed by the pancreas group  
23 of the surgical society of China medical association in 2000<sup>[32]</sup>. It is divided into four  
24 grades: cure, obvious effect, effective and ineffective. It can also be computed based  
25 on the 2002 edition of the guideline for clinical researches of traditional Chinese  
26 medicine new drugs<sup>[27]</sup>. It is divided into three levels: obvious effect, effective and  
27 ineffective.

28  
29 The proportion of SAP patients transferred to the ICU or scheduled for surgery: It  
30 is difficult to treat SAP patients with conservative therapies in the general ward. SIRS  
31 and MODS could exacerbate SAP symptoms. Therefore, some SAP patients could be  
32 transferred to ICU or scheduled for surgery.

33  
34 Gastrointestinal function includes abdominal pain and distension relief, recovery  
35 time of bowel sound, recovery time of defecation and time of resuming to diets  
36 (days).

37  
38 APACHE II is a useful prognostic scoring system for predicting the severity of  
39 acute pancreatitis and can be of vital importance in determining the group of patients  
40 who have more chance of requiring tertiary care in the course of treatment<sup>[33,34]</sup>.

#### 41 **The secondary outcomes**

42  
43 The secondary outcomes include visual analogue scale (VAS), the use of

1  
2  
3  
4 analgesics, the recovery time of blood amylase becoming normal, TNF- $\alpha$  counts, IL-6  
5 counts, IL-10 counts, length of hospital stay and adverse events related to acupuncture  
6 (such as fainting, nausea, haematoma and local infection).  
7  
8

### 9 10 **Types of interventions**

11 We will perform a systematic review and meta-analysis that includes all RCTs  
12 using acupuncture plus routine treatment (RT) in the treatment group and RT alone in  
13 the control group. RT includes fluid resuscitation, use of antibiotics, nutritional  
14 support and mechanical ventilation, etc.  
15  
16  
17  
18

### 19 **Search strategy**

#### 20 21 **Electronic searches**

22 We will search the following electronic databases from inception to June 30,  
23 2019: PubMed, the Cochrane Central Register of Controlled Trials, EMBASE, Web  
24 of Science, China National Knowledge Infrastructure (CNKI), Wan Fang Data and  
25 Chinese Science Journal Database. The searching strategy is available at appendix 1.  
26 No language or publication date will be restricted.  
27  
28  
29  
30  
31  
32

#### 33 **Searching other resources**

34 The reference lists of identified relevant RCTs, comments, reviews and  
35 overviews will be screened for additional relevant articles. The World Health  
36 Organization International Clinical Trials Registry Platform (ICTRP), Chinese  
37 Clinical Trial Registry, Google Scholar and ClinicalTrials.gov will also be searched to  
38 identify any planned, ongoing or unpublished literature.  
39  
40  
41  
42  
43  
44

#### 45 **Data extraction and management**

##### 46 **Selection of studies**

47 The selection of studies will be completed independently by two reviewers (CG  
48 and KZ). They will check results with each other. When disagreements occur, a third  
49 reviewer (QLT) will make the final decision. Full-texts of all included studies will be  
50 read if necessary. Details of the selection process will be shown in the PRISMA flow  
51 chart (Figure 1).  
52  
53  
54  
55  
56  
57

##### 58 **Data extraction and management**

59 A piloted data extraction form has been developed by reviewers. The following  
60

1  
2  
3  
4 information will be extracted from each included study independently by two authors  
5 (QLT and KZ): general information, study population, intervention characteristics and  
6 outcomes. Any disagreement will be resolved by discussion. If the information is  
7 unclear, missing or presented in a form that cannot be extracted, we will contact the  
8 corresponding author for additional information.  
9  
10  
11  
12

### 13 **Risk of bias assessment**

14  
15 Two reviewers (KZ and CYL) will independently assess the risk of bias using  
16 the Cochrane 'risk of bias' tool<sup>[35,36]</sup>. This tool includes the following seven domains:  
17 (1) random sequence generation (selection bias); (2) allocation concealment (selection  
18 bias); (3) blinding of participants and personnel (performance bias); (4) blinding of  
19 outcome assessment (detection bias); (5) incomplete outcome data (attrition bias); (6)  
20 selective reporting (reporting bias); (7) other bias. The risk of bias for each domain  
21 will be graded high, low or unclear based on the relevant information extracted from  
22 each eligible study. Any disagreement will be resolved by consensus.  
23  
24  
25  
26  
27  
28  
29  
30

### 31 **Measures of treatment effect**

32  
33 For continuous data, Mean Difference (MD) or Standard MD (SMD) will be  
34 used to measure the therapeutic effect with 95% confidence intervals (CIs). Risk  
35 ratios (RR) with 95% CIs will be calculated for dichotomous data.  
36  
37  
38

### 39 **Dealing with missing data**

40  
41 We will attempt to contact the original researchers by e-mail to obtain any  
42 missing or inadequate data if possible. We will also obtain data by phone. If we  
43 cannot obtain accurate data through the above methods, we will exclude these studies.  
44  
45  
46

### 47 **Assessment of heterogeneity**

48  
49 The heterogeneity will be tested by the Chi-squared test or  $I^2$  value. If the P value  
50 in Chi-squared test is less than 0.10 or  $I^2$  is more than 50%, the heterogeneity across  
51 studies will be statistically significant. When the heterogeneity is identified, a  
52 meta-analysis with the random-effect model will be used to estimate overall treatment  
53 effect. Moreover, a subgroup analysis or meta-regression will be conducted to explore  
54 the causes of heterogeneity among results of studies.  
55  
56  
57  
58  
59  
60

### **Assessment of reporting biases**

We will assess publication bias using the funnel plot and Egger's test if more than 10 trials are included.

### **Data synthesis**

The meta-analysis will be conducted using the Review Manager (RevMan) V.5.3 software. We will describe the effect size with RR for dichotomous data, and MD or SMD for continuous data. If  $I^2$  is less than 50%, the fixed-effects model will be used for data synthesis<sup>[37,38]</sup>. If  $I^2$  is greater than 50%, we will combine the data using random-effects model<sup>[37,38]</sup>. A narrative description of the results will be conducted when the meta-analysis is not feasible.

### **Subgroup analysis**

We will perform subgroup analysis to explore possible causes of heterogeneity if necessary. Subgroup analysis will be conducted based on the type of acupuncture intervention (body acupuncture, electroacupuncture, fire needling, elongated needle, warming needling), acupuncture point (single or multiple points), the duration of treatment, age and gender if possible.

### **Sensitivity analysis**

We will conduct sensitivity analyses to test the robustness of pooled treatment effects. The following factors will be taken into consideration:

1. Impact of high or unclear risk of bias: excluding studies with high or unclear risk of bias for certain domain, such as random sequence generation;
2. Impact of selected models: fixed-effects model versus random-effects model.

If inconsistent results are identified, caution will be taken in interpreting results and drawing conclusions.

### **Assessment method of evidence quality**

The quality of the evidence will be assessed using the Grading of Recommendations Assessment, Development and Evaluation (GRADE)<sup>[35]</sup>. The evaluation items include risk of bias, inconsistency, indirectness, imprecision, publication bias. Two authors (KZ and CG) will independently assess the quality of the evidence based on five levels of criteria. It will fall into one of four possible



1  
2  
3 ratings: high, moderate, low and very low.

#### 4 5 **Ethics and dissemination**

6  
7 This study will not involve personal information from individuals or violate their  
8 personal rights. Therefore, ethical approval will not be required. The results will be  
9 published in a peer-reviewed journal. Due to the lack of relevant systematic reviews  
10 in this field, this study will combine relevant RCTs to better explore evidence on  
11 acupuncture treatment for AP and guide clinical practice and acupuncture researches.  
12  
13

#### 14 15 **Patient and Public Involvement**

16  
17 Patients' priorities, experience, and preferences were not involved in  
18 development of the research question, and outcome measures, the design of this study,  
19 or the recruitment to and conduct of the study. The results will be not disseminated to  
20 study participants.  
21  
22

#### 23 24 **Amendments**

25  
26 If the protocol is modified, the information will be described in the final report.  
27  
28

#### 29 30 **Discussion**

31  
32 Acupuncture may be effective for AP. However, no systematic reviews on this  
33 topic have been published. This study will provide more convincing information on  
34 acupuncture for AP. This study has some potential limitations. Different types of  
35 acupuncture therapy may lead to a large degree of heterogeneity.  
36  
37

#### 38 39 **Protocol registration:**

40  
41 This protocol has been registered on PROSPERO (CRD42018115099).  
42  
43

#### 44 45 **Contributors**

46  
47 YL, JBZ and CZ conceived the study and provided general guidance to the drafting of  
48 the protocol. CG and KZ drafted the protocol. CYL designed the search strategy. CG,  
49 KZ, CYL, QLT and CZ drafted the manuscript. CG, KZ, CYL, CZ, JBZ, YL and  
50 QLT reviewed and revised the manuscript. All authors have read and approved the  
51  
52



1  
2  
3  
4 final version of the manuscript.  
5  
6

### 7 **Funding**

8  
9 The authors have not declared a specific grant for this research from any funding  
10 agency in the public, commercial or not-for-profit sectors.  
11  
12  
13

14  
15 **Competing interests:** None declared.  
16  
17

18  
19 **Ethics approval:** Not required.  
20  
21  
22

23 **Provenance and peer review:** Not commissioned; externally peer reviewed.  
24  
25

26  
27 **Data sharing statement:** The final report of this systematic review will be published  
28 in a peer-reviewed scientific journal, and the data set will be made freely available.  
29  
30  
31

32  
33 **Open access:** This is an Open Access article distributed in accordance with the terms  
34 of the Creative Commons Attribution Non Commercial (CC BY-NC 4.0) license,  
35 which permits others to distribute, remix, adapt and build upon this work  
36 non-commercially, and license their derivative works on different terms, provided the  
37 original work is properly cited and the use is non-commercial. See: [http://](http://creativecommons.org/licenses/by-nc/4.0/)  
38  
39  
40  
41  
42  
43  
44  
45  
46

### 47 **Reference**

- 48 [1] Xu WB, Hu QH, Wu CN, et al. Serum soluble fibrinogen-like protein 2  
49 concentration predicts delirium after acute pancreatitis. *Brain Behav* 2019:e01261.  
50  
51 [2] Sarri G, Guo Y, Iheanacho I, et al. Moderately severe and severe acute  
52 pancreatitis : a systematic review of the outcomes in the USA and European Union-5.  
53 *BMJ Open Gastroenterol* 2019;6(1):e000248.  
54  
55 [3] Forsmark CE, Vege SS, Wilcox CM. Acute Pancreatitis. *N Engl J Med*  
56  
57  
58  
59  
60 2016;375(20):1972-1981.

- 1  
2  
3  
4 [4] Lankisch PG, Apte M, Banks PA. Acute pancreatitis. *Lancet*  
5 2015;386(9988):85-96.  
6  
7 [5] Li Y, Zhao Y, Feng L, et al. Comparison of the prognostic values of  
8 inflammation markers in patients with acute pancreatitis: a retrospective cohort study.  
9 *BMJ Open* 2017;7(3):e013206.  
10  
11 [6] van Dijk SM, Hallensleben NDL, van Santvoort HC, et al. Acute pancreatitis:  
12 recent advances through randomised trials. *Gut* 2017;66(11):2024-2032.  
13  
14 [7] Waller A, Long B, Koyfman A, et al. Acute Pancreatitis: Updates for Emergency  
15 Clinicians. *J Emerg Med* 2018;55(6):769-779.  
16  
17 [8] Wang X, Gong Z, Wu K, et al. Gastrointestinal dysmotility in patients with acute  
18 pancreatitis. *J Gastroenterol Hepatol* 2003;18(1):57-62.  
19  
20 [9] Singh VK, Wu BU, Bollen TL, et al. Early systemic inflammatory response  
21 syndrome is associated with severe acute pancreatitis. *Clin Gastroenterol Hepatol*  
22 2009;7(11):1247-51.  
23  
24 [10] Halonen KI1, Pettilä V, Leppäniemi AK, et al. Multiple organ dysfunction  
25 associated with severe acute pancreatitis. *Crit Care Med* 2002 ;30(6):1274-1279.  
26  
27 [11] McKay CJ, Buter A. Natural history of organ failure in acute pancreatitis.  
28 *Pancreatology* 2003;3(2):111-114.  
29  
30 [12] Diehl DL. Acupuncture for gastrointestinal and hepatobiliary disorders. *J Altern*  
31 *Complement Med* 1999;5(1):27-45.  
32  
33 [13] Wang CW, Li N, He HB, et al. Effect of electroacupuncture of Tianshu (ST 25)  
34 on the rational symptoms of functional constipation patients and evaluation on its  
35 efficacy satisfaction: a single-center, prospective, practical and randomized control  
36 trial. *Zhen Ci Yan Jiu* 2010;35(5):375-379.  
37  
38 [14] Basurto Ona X, Rigau Comas D, Urrútia G. Opioids for acute pancreatitis pain.  
39 *Cochrane Database Syst Rev* 2013:CD009179.  
40  
41 [15] Minozzi S, Amato L, Davoli M. Development of dependence following treatment  
42 with opioid analgesics for pain relief: a systematic review. *Addiction*  
43 2013;108(4):688-698.  
44  
45 [16] Vanderploeg K, Yi X. Acupuncture in modern society. *J Acupunct Meridian*  
46  
47  
48  
49  
50  
51  
52  
53  
54  
55  
56  
57  
58  
59  
60

1  
2  
3  
4 Stud 2009;2(1):26-33.

5 [17] Felson DT, Lawrence RC, Hochberg MC, et al. Osteoarthritis: New Insights. Part  
6 2: Treatment Approaches. *Ann Intern Med* 2000;133(9):726-737.

7  
8 [18] Andersson S, Lundeberg T. Acupuncture--from empiricism to science: functional  
9 background to acupuncture effects in pain and disease. *MED HYPOTHESES*  
10 1995;45(3):271-281.

11 [19] Cosen-Binker LI, Binker MG, Negri G, et al. Acute pancreatitis possible initial  
12 triggering mechanism and prophylaxis. *PANCREATOLOGY* 2003;3(6):445-456.

13 [20] Winsö O, Kral J, Wang W, et al. Thoracic epidural anaesthesia reduces insulin  
14 resistance and inflammatory response in experimental acute pancreatitis. *Ups J Med*  
15 *Sci* 2018;123(4):207-215.

16 [21] Pooran N, Indaram A, Singh P, et al. Cytokines (IL-6, IL-8, TNF): early and  
17 reliable predictors of severe acute pancreatitis. *J Clin Gastroenterol*  
18 2003;37(3):263-266.

19 [22] Xue QM, Huang L, Li N. Effects of electroacupuncture at Tianshu (ST25) on  
20 pro- and anti-inflammatory cytokines in rats with severe acute pancreatitis. *Zhong Xi*  
21 *Yi Jie He Xue Bao* 2011;9(6):658-664.

22 [23] Torres-Rosas R, Yehia G, Pena G, et al. Dopamine Mediates the Vagal  
23 Modulation of the Immune System by Electroacupuncture. *Nat Med*  
24 2014;20(3):291-295.

25 [24] Xue QM, Pan H, Huang L, et al. Effects of acupuncture at ST25 on inflammatory  
26 mediators and nuclear factor  $\kappa$ B activation in a rat model of severe acute pancreatitis.  
27 *Acupuncture in medicine* 2015;33(4):299-304.

28 [25] Zhu SF, Guo H, Zhang RR, et al. Effect of electroacupuncture on the  
29 inflammatory response in patients with acute pancreatitis: An exploratory study.  
30 *Acupuncture in Medicine* 2015;33(2):115-120.

31 [26] Li L, Yu J, Mu R, et al. Clinical Effect of Electroacupuncture on Lung Injury  
32 Patients Caused by Severe Acute Pancreatitis. *Evid Based Complement Alternat Med*  
33 2017;2017:3162851.

34 [27] Luo YH, Zhong GW, Zhao SP, et al. Efficacy observation of electroacupuncture  
35  
36  
37  
38  
39  
40  
41  
42  
43  
44  
45  
46  
47  
48  
49  
50  
51  
52  
53  
54  
55  
56  
57  
58  
59  
60

1  
2  
3  
4 intervention on severe acute pancreatitis at early stage complicated with intestinal  
5 paralysis. *Zhongguo Zhen Jiu* 2011;31(2):105-109.

6  
7 [28] Banks PA, Bollen TL, Dervenis C, et al. Classification of acute  
8 pancreatitis--2012: revision of the Atlanta classification and definitions by  
9 international consensus. *GUT* 2013;62(1):102-111.

10  
11 [29] Munigala S, Subramaniam D, Subramaniam DP, et al. Predictors for early  
12 readmission in acute pancreatitis (AP) in the United States (US) - A nationwide  
13 population based study. *PANCREATOLOGY* 2017;17(4):534-542.

14  
15 [30] Zhao YP. Clinical importance of guideline for severe acute pancreatitis of China.  
16 *Zhonghua Wai Ke Za Zhi* 2007;45(11):721.

17  
18 [31] Sarr MG. 2012 revision of the Atlanta classification of acute pancreatitis. *Pol*  
19 *Arch Med Wewn* 2013;123(3):118-124.

20  
21 [32] Wang XY. Electroacupuncture for treatment of acute pancreatitis and its effect  
22 on the intestinal permeability of the patient. *Zhongguo Zhen Jiu* 2007;27(6):421-423.

23  
24 [33] Harshit Kumar A, Singh Griwan M. A comparison of APACHE II, BISAP,  
25 Ranson's score and modified CTSI in predicting the severity of acute pancreatitis  
26 based on the 2012 revised Atlanta Classification. *Gastroenterol Rep (Oxf)*  
27 2018;6(2):127-131.

28  
29 [34] Rathnakar SK, Vishnu VH, Muniyappa S, et al. Accuracy and Predictability of  
30 PANC-3 Scoring System over APACHE II in Acute Pancreatitis: A Prospective Study.  
31 *J Clin Diagn Res* 2017;11(2):PC10-PC13.

32  
33 [35] Chandler J, Higgins JPT, Deeks JJ, Davenport C, Clarke MJ. *Cochrane*  
34 *Handbook for Systematic Reviews of Interventions Version 5.2.0 (updated February*  
35 *2017), Cochrane, 2017. Available from Cochrane Community.*

36  
37 [36] Zeng X, Zhang Y, Kwong JS, et al. The methodological quality assessment tools  
38 for preclinical and clinical studies, systematic review and meta-analysis, and clinical  
39 practice guideline: a systematic review. *J Evid Based Med.* 2015;8(1):2-10.

40  
41 [37] WenQi Huang, Zhu Yang, DongXin Tang, et al. Pharmacological intervention of  
42 traditional Chinese medicine for the quality of life in patients with colorectal cancer: a  
43 systematic review and meta-analysis. *Traditional Medicine Research* 2018;3(2):  
44  
45  
46  
47  
48  
49  
50  
51  
52  
53  
54  
55  
56  
57  
58  
59  
60

1  
2  
3  
4 95-105.

5 [38] Yanli Chen, Yunrui Jin, Yihua Fan, et al. Meta-analysis of neostigmine injections  
6 given at the Zusanli (ST 36) acupoint in the treatment of postpartum urinary retention.  
7  
8 Traditional Medicine Research 2018;3(2): 106-114.  
9  
10  
11  
12

13 **Figure legends:**

14  
15 Figure 1 Study selection flow diagram  
16  
17  
18  
19  
20  
21  
22  
23  
24  
25  
26  
27  
28  
29  
30  
31  
32  
33  
34  
35  
36  
37  
38  
39  
40  
41  
42  
43  
44  
45  
46  
47  
48  
49  
50  
51  
52  
53  
54  
55  
56  
57  
58  
59  
60

For peer review only

1  
2  
3  
4  
5  
6  
7  
8  
9  
10  
11  
12  
13  
14  
15  
16  
17  
18  
19  
20  
21  
22  
23  
24  
25  
26  
27  
28  
29  
30  
31  
32  
33  
34  
35  
36  
37  
38  
39  
40  
41  
42  
43  
44  
45  
46  
47  
48  
49  
50  
51  
52  
53  
54  
55  
56  
57  
58  
59  
60

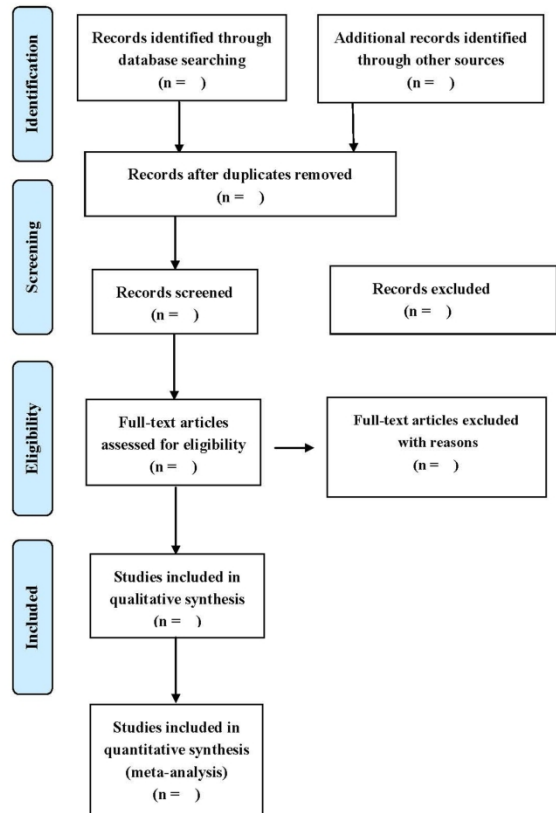

Figure 1 Study selection flow diagram

210x297mm (300 x 300 DPI)

## Appendix 1.

## PubMed Search strategy:

1. "acupuncture Therapy"[Mesh]
2. "acupuncture Analgesia"[Mesh]
3. "acupuncture, Ear"[Mesh]
4. " electroacupuncture "[Mesh]
5. " acupuncture points "[Mesh]
6. " meridians"[Mesh]
7. acupunctur\*.tw
8. acupotom\*.tw
9. (electroacupuncture OR electro-acupuncture).tw
10. acupoint\*.tw
11. ((meridian OR non-meridian OR trigger) AND point\*).tw
12. OR/1-11
13. "Pancreatitis/etiology"[Mesh:NoExp]
14. "Pancreatitis, Acute Necrotizing"[Mesh]
15. "Pancreatitis, Alcoholic"[Mesh]
16. acute pancreatitis.tw
17. alcoholic Pancreatitis.tw
18. acute pancreatitides.tw
19. cute pncretitis.tw
20. pancreatitis acuta.tw
21. SAP.tw
22. OR/13-21
23. randomized controlled trial.pt
24. controlled clinical trial.pt
25. randomized.tw
26. placebo.tw
27. "Clinical Trials as Topic"[Mesh]
28. Random\* .tw
29. trial.tw
30. OR/23-29
31. Animals/ NOT humans/
32. 30 NOT 31
33. 12 AND 22 AND 32

## EMBASE Search strategy:

1. 'acupuncture'/exp
2. ' acupuncture Analgesia '/exp
3. ' auricular acupuncture '/exp
4. ' electroacupuncture '/exp
5. acupunctur\*: ti, ab
6. acupotom\*: ti, ab
7. (electroacupuncture OR electro-acupuncture) : ti, ab
8. acupoint\*: ti, ab
9. ((meridian OR non-meridian OR trigger) AND point\*): ti, ab
10. OR/1-9
11. ' acute hemorrhagic pancreatitis '/exp
12. 'acute pancreatitis'/exp
13. ' alcoholic pancreatitis '/exp
14. 'acute pancreatitis': ti, ab
15. alcoholic NEAR/3 pancreatitis
16. acute NEAR/3 pancreatitides
17. ' cute pncretitis' ti, ab
18. ' pancreatitis acuta ' ti, ab
19. 'SAP': ti, ab
20. OR/11-19
21. randomized controlled trial/exp
22. 'randomized controlled trial (topic)'/exp
23. Placebo:ti,ab
24. random\*:ti,ab
25. RCT:ti,ab
26. OR/21-25
27. (exp animal/ or exp animal experiment/ or nonhuman/) not exp human/
28. 26 NOT 27
29. 10 AND 20 AND 28 AND [embase]/lim



## Cochrane Central Register of Controlled Trials (CENTRAL) Search strategy:

1. MeSH descriptor: [acupuncture Therapy] explode all trees
2. MeSH descriptor: [acupuncture Analgesia] explode all trees
3. MeSH descriptor: [acupuncture, Ear] explode all trees
4. MeSH descriptor: [electroacupuncture] explode all trees
5. MeSH descriptor: [acupuncture points] explode all trees
6. MeSH descriptor: [meridians] explode all trees
7. acupunctur\*:ti,ab,kw
8. acupotom\*:ti,ab,kw
9. (electroacupuncture OR electro-acupuncture) :ti,ab,kw
10. acupoint\*:ti,ab,kw
11. ((meridian OR non-meridian OR trigger) AND point\*):ti,ab,kw
12. OR/1-11
13. MeSH descriptor: [Pancreatitis, Acute Necrotizing] explode all trees
14. MeSH descriptor: [Pancreatitis] this term only and with qualifier(s): [Etiology - ET]
15. MeSH descriptor: [Pancreatitis, Alcoholic] explode all trees
16. (acute near/3 pancrea\*):ti,ab,kw
17. (necro\* near/3 pancrea\*):ti,ab,kw
18. (inflam\* near/3 pancrea\*):ti,ab,kw
19. ((interstitial or edema\* or oedema\*) near/2 pancrea\*):ti,ab,kw
20. OR/13-19
21. MeSH descriptor: [Randomized Controlled Trial] explode all trees
22. MeSH descriptor: [Randomized Controlled Trials as Topic] explode all trees
23. randomized. ti,ab,kw
24. placebo. ti,ab,kw
25. randomly ti,ab,kw
26. OR/21-25
27. 12 AND 20 AND 26

## Web of science Search strategy:

1. TS=((acute or necro\* or inflam\* or interstitial or edema\* or oedema\*) near/3 pancrea\*)
2. TS=( alcoholic Pancreatitis OR acute pancreatitides OR pancreatitis acuta)
3. OR/1-2
4. TS=( \*acupunctur\* OR Acupoint\*)
5. TS=random\*
6. 3 AND 4 AND 5

1  
2  
3  
4 China National Knowledge Infrastructure (CNKI) Search strategy:

5 (SU=急性胰腺炎 OR SU=胰腺 OR SU=胰腺炎) AND (SU=针刺 OR SU=针灸  
6 OR SU=体针 OR SU=毫针 OR SU=毫针针刺 OR SU=电针 OR SU=温针灸 OR  
7 SU=温针 OR SU=火针 OR SU=燔针 OR SU=浮针 OR SU=耳针 OR SU=头针  
8 OR SU=头皮针 OR SU=腹针 OR SU=腕踝针 OR SU=眼针)AND (SU=随机 OR  
9 FT=随机)  
10  
11  
12  
13  
14  
15  
16

17 WANFANG data Search strategy:

18 主题:( 针刺 OR 针灸 OR 体针 OR 毫针 OR 毫针针刺 OR 电针 OR 温针灸 OR  
19 温针 OR 火针 OR 燔针 OR 浮针 OR 耳针 OR 头针 OR 头皮针 OR 腹针 OR  
20 腕踝针 OR 眼针)\*主题:( 急性胰腺炎 OR 胰腺 OR 胰腺炎)\*随机  
21  
22  
23  
24  
25  
26

27 Chinese Science Journal Database

28 (M=(急性胰腺炎+胰腺+胰腺炎))\*(M=(针刺+针灸+体针+毫针+毫针针刺+电针+  
29 温针灸+温针+火针+燔针+浮针+耳针+头针+头皮针+腹针+腕踝针+眼针))\*U=随  
30 机  
31  
32  
33  
34  
35  
36  
37  
38  
39  
40  
41  
42  
43  
44  
45  
46  
47  
48  
49  
50  
51  
52  
53  
54  
55  
56  
57  
58  
59  
60

## PRISMA-P 2015 checklist

| Section and topic          | Item No | Checklist item                                                                                                                                                                                  | Page |
|----------------------------|---------|-------------------------------------------------------------------------------------------------------------------------------------------------------------------------------------------------|------|
| Administrative information |         |                                                                                                                                                                                                 |      |
| Title                      |         |                                                                                                                                                                                                 |      |
| Identification             | 1a      | Identify the report as a protocol of a systematic review                                                                                                                                        | 1    |
| Update                     | 1b      | If the protocol is for an update of a previous systematic review, identify as such                                                                                                              | No   |
| Registration               | 2       | If registered, provide the name of the registry (such as PROSPERO) and registration number                                                                                                      | 2    |
| Authors:                   |         |                                                                                                                                                                                                 |      |
| Contact                    | 3a      | Provide name, institutional affiliation, e-mail address of all protocol authors; provide physical mailing address of corresponding author                                                       | 1    |
| Contributions              | 3b      | Describe contributions of protocol authors and identify the guarantor of the review                                                                                                             | 9    |
| Amendments                 | 4       | If the protocol represents an amendment of a previously completed or published protocol, identify as such and list changes; otherwise, state plan for documenting important protocol amendments | 9    |
| Support:                   |         |                                                                                                                                                                                                 |      |
| Sources                    | 5a      | Indicate sources of financial or other support for the review                                                                                                                                   | 10   |
| Sponsor                    | 5b      | Provide name for the review funder and/or sponsor                                                                                                                                               | 9    |
| Role of sponsor or funder  | 5c      | Describe roles of funder(s), sponsor(s), and/or institution(s), if any, in developing the protocol                                                                                              | 9    |
| Introduction               |         |                                                                                                                                                                                                 |      |
| Rationale                  | 6       | Describe the rationale for the review in the context of what is already known                                                                                                                   | 3-4  |
| Objectives                 | 7       | Provide an explicit statement of the question(s) the review will address with reference to participants, interventions, comparators, and outcomes (PICO)                                        | 4    |
| Methods                    |         |                                                                                                                                                                                                 |      |
| Eligibility criteria       | 8       | Specify the study characteristics (such as PICO, study design, setting, time frame) and report                                                                                                  | 4-6  |

|                                    |     |                                                                                                                                                                                                                                                           |     |
|------------------------------------|-----|-----------------------------------------------------------------------------------------------------------------------------------------------------------------------------------------------------------------------------------------------------------|-----|
|                                    |     | characteristics (such as years considered, language, publication status) to be used as criteria for eligibility for the review                                                                                                                            |     |
| Information sources                | 9   | Describe all intended information sources (such as electronic databases, contact with study authors, trial registers or other grey literature sources) with planned dates of coverage                                                                     | 6   |
| Search strategy                    | 10  | Present draft of search strategy to be used for at least one electronic database, including planned limits, such that it could be repeated                                                                                                                | 6   |
| Study records                      |     |                                                                                                                                                                                                                                                           |     |
| Data management                    | 11a | Describe the mechanism(s) that will be used to manage records and data throughout the review                                                                                                                                                              | 6   |
| Selection process                  | 11b | State the process that will be used for selecting studies (such as two independent reviewers) through each phase of the review (that is, screening, eligibility and inclusion in meta-analysis)                                                           | 6   |
| Data collection process            | 11c | Describe planned method of extracting data from reports (such as piloting forms, done independently, in duplicate), any processes for obtaining and confirming data from investigators                                                                    | 6-7 |
| Data items                         | 12  | List and define all variables for which data will be sought (such as PICO items, funding sources), any pre-planned data assumptions and simplifications                                                                                                   | 6-7 |
| Outcomes and prioritization        | 13  | List and define all outcomes for which data will be sought, including prioritization of main and additional outcomes, with rationale                                                                                                                      | 5-6 |
| Risk of bias in individual studies | 14  | Describe anticipated methods for assessing risk of bias of individual studies, including whether this will be done at the outcome or study level, or both; state how this information will be used in data synthesis                                      | 7   |
| Data synthesis                     | 15a | Describe criteria under which study data will be quantitatively synthesised                                                                                                                                                                               | 8   |
|                                    | 15b | If data are appropriate for quantitative synthesis, describe planned summary measures, methods of handling data and methods of combining data from studies, including any planned exploration of consistency (such as I <sup>2</sup> , Kendall's $\tau$ ) | 8   |

|                                   |     |                                                                                                                               |     |
|-----------------------------------|-----|-------------------------------------------------------------------------------------------------------------------------------|-----|
|                                   | 15c | Describe any proposed additional analyses (such as sensitivity or subgroup analyses, meta-regression)                         | 8   |
|                                   | 15d | If quantitative synthesis is not appropriate, describe the type of summary planned                                            | 8   |
| Meta-bias(es)                     | 16  | Specify any planned assessment of meta-bias(es) (such as publication bias across studies, selective reporting within studies) | 8   |
| Confidence in cumulative evidence | 17  | Describe how the strength of the body of evidence will be assessed (such as GRADE)                                            | 8-9 |
