# Supplementary material for: Efficacy and safety of acupuncture as an adjuvant treatment for acute pancreatitis: a protocol of systematic review and meta-analysis
Source: PubMed Central journal article supplement — BMJ Open. 2019 Jul 4;9(7):e029327. doi: 10.1136/bmjopen-2019-029327 (PMC6615812; doi:10.1136/bmjopen-2019-029327), 2019-07-04
Supplement: bmjopen-2019-029327supp001.pdf [file bmjopen-2019-029327supp001.pdf]

Appendix 1.

PubMed Search strategy:

1. "acupuncture Therapy"[Mesh]
2. "acupuncture Analgesia"[Mesh]
3. "acupuncture, Ear"[Mesh]
4. " electroacupuncture "[Mesh]
5. " acupuncture points "[Mesh]
6. " meridians"[Mesh]
7. acupunctur\*.tw
8. acupotom\*.tw
9. (electroacupuncture OR electro-acupuncture).tw
10. acupoint\*.tw
11. ((meridian OR non-meridian OR trigger) AND point\*).tw
12. OR/1-11
13. "Pancreatitis/etiology"[Mesh:NoExp]
14. "Pancreatitis, Acute Necrotizing"[Mesh]
15. "Pancreatitis, Alcoholic"[Mesh]
16. acute pancreatitis.tw
17. alcoholic Pancreatitis.tw
18. acute pancreatitides.tw
19. cute pncretitis.tw
20. pancreatitis acuta.tw
21. SAP.tw
22. OR/13-21
23. randomized controlled trial.pt
24. controlled clinical trial.pt
25. randomized.tw
26. placebo.tw
27. "Clinical Trials as Topic"[Mesh]
28. Random\* .tw
29. trial.tw
30. OR/23-29
31. Animals/ NOT humans/
32. 30 NOT 31
33. 12 AND 22 AND 32

EMBASE Search strategy:

1. 'acupuncture'/exp
2. 'acupuncture Analgesia '/exp
3. 'auricular acupuncture '/exp
4. 'electroacupuncture '/exp
5. acupunctur\*: ti, ab
6. acupotom\*: ti, ab
7. (electroacupuncture OR electro-acupuncture) : ti, ab
8. acupoint\*: ti, ab
9. ((meridian OR non-meridian OR trigger) AND point\*): ti, ab
10. OR/1-9
11. 'acute hemorrhagic pancreatitis '/exp
12. 'acute pancreatitis'/exp
13. 'alcoholic pancreatitis '/exp
14. 'acute pancreatitis': ti, ab
15. alcoholic NEAR/3 pancreatitis
16. acute NEAR/3 pancreatitides
17. 'cute pncretitis' ti, ab
18. 'pancreatitis acuta ' ti, ab
19. 'SAP': ti, ab
20. OR/11-19
21. randomized controlled trial/exp
22. 'randomized controlled trial (topic)'/exp
23. Placebo:ti,ab
24. random\*:ti,ab
25. RCT:ti,ab
26. OR/21-25
27. (exp animal/ or exp animal experiment/ or nonhuman/) not exp human/
28. 26 NOT 27
29. 10 AND 20 AND28 AND [embase]/lim

Cochrane Central Register of Controlled Trials (CENTRAL) Search strategy:

1. MeSH descriptor: [acupuncture Therapy] explode all trees
2. MeSH descriptor: [acupuncture Analgesia] explode all trees
3. MeSH descriptor: [acupuncture, Ear] explode all trees
4. MeSH descriptor: [electroacupuncture] explode all trees
5. MeSH descriptor: [acupuncture points] explode all trees
6. MeSH descriptor: [meridians] explode all trees
7. acupunctur\*:ti,ab,kw
8. acupotom\*:ti,ab,kw
9. (electroacupuncture OR electro-acupuncture) :ti,ab,kw
10. acupoint\*:ti,ab,kw
11. ((meridian OR non-meridian OR trigger) AND point\*):ti,ab,kw
12. OR/1-11
13. MeSH descriptor: [Pancreatitis, Acute Necrotizing] explode all trees
14. MeSH descriptor: [Pancreatitis] this term only and with qualifier(s): [Etiology - ET]
15. MeSH descriptor: [Pancreatitis, Alcoholic] explode all trees
16. (acute near/3 pancrea\*):ti,ab,kw
17. (necro\* near/3 pancrea\*):ti,ab,kw
18. (inflam\* near/3 pancrea\*):ti,ab,kw
19. ((interstitial or edema\* or oedema\*) near/2 pancrea\*):ti,ab,kw
20. OR/13-19
21. MeSH descriptor: [Randomized Controlled Trial] explode all trees
22. MeSH descriptor: [Randomized Controlled Trials as Topic] explode all trees
23. randomized. ti,ab,kw
24. placebo. ti,ab,kw
25. randomly ti,ab,kw
26. OR/21-25
27. 12 AND 20 AND 26

Web of science Search strategy:

1. TS=((acute or necro\* or inflam\* or interstitial or edema\* or oedema\*) near/3 pancrea\*)
2. TS=( alcoholic Pancreatitis OR acute pancreatitides OR pancreatitis acuta)
3. OR/1-2
4. TS=( \*acupunctur\* OR Acupoint\*)
5. TS=random\*
6. 3 AND 4 AND 5

China National Knowledge Infrastructure (CNKI) Search strategy:

(SU=急性胰腺炎 OR SU=胰腺 OR SU=胰腺炎) AND (SU=针刺 OR SU=针灸 OR SU=体针 OR SU=毫针 OR SU=毫针针刺 OR SU=电针 OR SU=温针灸 OR SU=温针 OR SU=火针 OR SU=燔针 OR SU=浮针 OR SU=耳针 OR SU=头针 OR SU=头皮针 OR SU=腹针 OR SU=腕踝针 OR SU=眼针)AND (SU=随机 OR FT=随机)

WANFANG data Search strategy:

主题:( 针刺 OR 针灸 OR 体针 OR 毫针 OR 毫针针刺 OR 电针 OR 温针灸 OR 温针 OR 火针 OR 燔针 OR 浮针 OR 耳针 OR 头针 OR 头皮针 OR 腹针 OR 腕踝针 OR 眼针)\*主题:( 急性胰腺炎 OR 胰腺 OR 胰腺炎)\*随机

Chinese Science Journal Database

(M=(急性胰腺炎+胰腺+胰腺炎))\*(M=(针刺+针灸+体针+毫针+毫针针刺+电针+温针灸+温针+火针+燔针+浮针+耳针+头针+头皮针+腹针+腕踝针+眼针))\*U=随机
